# Supplementary material
Source: Research Square preprint supplement (doi:10.21203/rs.3.rs-8842634/v1)
Supplement: Supplementary file 1 [file e999c53e414de811ff0a7ae0.docx]

**Supporting information**

**Taurolithocholic acid alleviates hepatic glycolipid dysregulation in low birth weight piglets by activating HNF4α and FXR**

Tianle Gao[[1]](#footnote-0), Hairong Liang1, Meizheng Li1, Rui Zhou1, Li Wang1,3, Ran Li1, Lingjie Huang1, Yong Zhuo1, Shengyu Xu1, Yan Lin1, Bin Feng1, Jian Li1, Hua Li1, Lun Hua1, Lianqiang Che1, De Wu1, Liang Hu1*, Zhengfeng Fang1,2*

Supplementary Material and Methods

**Table S1.** Ingredient and nutrient composition of experimental diets (%, as-fed basis).

| Items | Gestation | Lactation |
| --- | --- | --- |
| Ingredients% |  |  |
| Corn | 57.79 | 51.17 |
| Wheat bran | 14.00 | 10.00 |
| Rice bran | 8.00 | 4.00 |
| Soybean meal | 11.00 | 15.45 |
| Soybean hull | 5.06 | - |
| Soybean oil | 0.55 | 2.53 |
| Soybean, heat-treated | - | 8.00 |
| Fish meal Peru | - | 2.00 |
| Sucrose | - | 2.00 |
| Glucose | - | 2.00 |
| L-lysine HCl（78.8%） | 0.16 | 0.13 |
| DL-methionine (98%) | 0.04 | - |
| L-Threonine (98%) | 0.11 | 0.02 |
| L-Tryptophan (98%) | 0.03 | - |
| L-Valine (99%) | - | 0.08 |
| Dicalcium phosphate | 1.22 | 0.89 |
| Limestone | 1.12 | 0.89 |
| Sodium chloride | 0.40 | 0.40 |
| Premixa | 0.52 | 0.44 |
| Total | 100 | 100 |
| Calculated analysis |  |  |
| DE, Mcal/kg | 12.77 | 14.24 |
| ME, Mcal/kg | 11.87 | 13.13 |
| Crude protein, % | 14.22 | 18.21 |
| Calcium, % | 0.70 | 0.66 |
| phosphorus, % | 0.81 | 0.71 |

aThe premix (per kilogram of diet) provided the following: Gestation: Fe, 95mg; Cu, 46 mg; Zn, 100 mg; Mn, 54 mg and Se, 0.17 mg. vitamin A, 6000 IU; vitamin E, 50 IU; vitamin D3, 1200 IU; vitamin K3, 2.4 mg; vitamin B1, 1 mg; vitamin B2, 3.6 mg; vitamin B6, 1.8 mg; vitamin B12, 0.0125 mg; biotin, 0.24 mg; folic acid, 2 mg; niacin, 25 mg; pantothenic acid, 14 mg; preservative, 500 g; antioxidant, 200 g; mycotoxin adsorbent, 1000 g; and choline chloride (60%), 1300 g. Lactation: Fe, 100 mg; Cu, 25 mg; Zn, 125 mg; Mn, 35 mg; I, 0.2 mg; and Se, 0.3 mg. Vitamin A, 6000 IU; vitamin A, 50 IU; vitamin D3, 1200 IU; vitamin K3, 2.4 mg; vitamin B1, 1 mg; vitamin B1, 3.6 mg; vitamin B6, 1.8 mg; vitamin B12, 0.0125 mg; biotin, 0.24 mg; folic acid, 2 mg; niacin, 25 mg; pantothenic acid, 14 mg; preservative, 500 g; antioxidant, 200 g; mycotoxin adsorbent, 1000 g; and choline chloride (60%), 1000 g.

Table S2. Primer sequences of target and reference genes in pig study.

| Gene | Primer sequence (5'-3') | |
| --- | --- | --- |
| forward | revese |
| BAAT | TCCCCATTGAAAAGGCCCAG | GTTCTGTGGCTTGTTGTGCG |
| FGF19 | TGAGTACCGTGGCGATCAAG | GCGGATCTCCTCCTCGAAAG |
| BESP | CGCAGCGTGAAGAAATGTGG | AAAACCGAAACAGTTGAAAGAGGC |
| CYP8B1 | GGAGCGACTTGGCTTTCTCT | GCAGGCGGAGGAGTTATTCA |
| HNF4α | GCTTCTTTCGGAGGAGTGTG | TTGACCTGCGAGTGCTGAT |
| FXR | TATGAACTCAGGCGAATGCCTGCT | ATCCAGATGCTCTGTCTCCGCAAA |
| CYP7A1 | GAAAGAGAGACCACATCTCGG | GAATGGTGTTGGCTTGCGAT |
| CYP27A1 | ACTGAAGACCGCGATGAAAC | CAAAGGCGAATCAGGAAGGG |
| CYP4A21 | TTTTCCCGCTTGAGGAGTGC | ACTCGGTCTGTGTGTTGATGGA |
| MRP2 | TGCAAGTACGGACCAGTGTC | AACGGTGTACTGCTTCCTGG |
| MRP3 | TGGACAAAGGGACAATAGCTGAGT | TGGCCATCCCGTAGAAGATG |
| OSTβ | GAAATCCAAAGACGCTGCCA | CCCTTAGGATGGTCAGGTTGT |
| OATP1 | TGACACTGGATCGGTGAACA | AGGAATGGCAGTGAGCACAT |
| SULT2A1 | CCATGCGAGACAAGGAGAAC | CATGACCTGGAAGGAGCTGT |
| SLC27A5 | CATTCAGTCCGCCTGGCTAT | AAGCCGACATTGCCTTCTGT |
| GYS2 | AATTCTGTGGGAAGCCCAGC | GCAGGGATTCAGAGCTGGTA |
| GCK | CCGACTTCCTGGACAAGCAT | ATCGTGGCCACAGTGTCATT |
| PFKL | ACTCCCTTCGACCGGAACTA | TGCTCAAAGTCGGTGTCCTA |
| PKLR | CCCACTGAAGTCACCGCTAT | GAGGAAGCCACGGAGTTTT |
| PYGL | ATCGGGGAGGACTACGTGAA | CTCGGAGGAAGACATCGTCG |
| G6PC | TGAACGTCTGTCTGTCACGA | ATACTTCTTGAGGCTGGCGT |
| PC | GGACTTCACTGCCACCTTTG | GCTCCACCTCAAACTCCTCT |
| GLUT2 | GGTTCATGGTGGCCGAGTT | ATTGCGGGTCCAGTTGC |
| HSL | AGTGCCTATGCTGGCGGGGA | CCCAGGCGGAGGTCTCGGAA |
| ATGL | GGCGGAACGGCCTCCTGAAC | TTGGCTCCGGCCCTCTCCTC |
| PPARγ | AAGACGGGGTCCTCATCTCC | CGCCAGGTCGCTGTCATCT |
| ACC | AGCAAGGTCGAGACCGAAAG | TAAGACCACCGGCGGATAGA |
| FAS | CTACGAGGCCATTGTGGACG | AGCCTATCATGCTGTAGCCC |
| SREBP-1c | AAGCGGACGGCTCACAATG | GCAAGACGGCGGATTTATTCA |
| CPT1α | GATTATCCACCAGCCAGACCC | CCCCACAATAATGTACGACACC |
| HMGCS2 | GGACCAAACAGACCTGGAGA | ATGGTCTCAGTGCCCACTTC |
| PPARα | GAGTTCGCCAAGTCCATCC | CCGTCCTTGTTCATCACAGAG |
| β-actin | CACCTTCTACAACGAGCTGC | TCATCTTCTCACGGTTGGCT |

Table S3. Primer sequences of target and reference genes in Hepa 1-6 cell lines.

| Gene | Primer sequence (5'-3') | |
| --- | --- | --- |
| forward | revese |
| HSL | TGGTGACACTCGCAGAAGAC | GATGGCAGGTGTGAACTGGA |
| GLUT2 | TGAGTTCCTTCCAGTTCGGC | ATTCCTGAGAACTGCTGGGC |
| GYS2 | TCCTCAGTACCACCTTCC | AGCCTCCTCTTCCTCATC |
| β-actin | GGAGATTACTGCCCTGGCTCCTA | GACTCATCGTACTCCTGCTTGCTG |
| SHP | CGATCCTCTTCAACCCAGATG | AGGGCTCCAAGACTTCACACA |
| CYP7A1 | AGCAACTAAACAACCTGCCAGT | ACTAGTCCGGATATTCAAGGATGCA |
| FXR | CGTGACTTGCGNCAAGTGACC | CCANGACATCAGCATCTCAGC |
| HNF4α | GGGCTGGCATGAAGAAGGAAGC | CCATGCCGAAGAGCTTGATGAAC |
| PPARα | GATGCACTGCTATGAGCACTT | AGAGGTCCACAGAGCTGATCC |
| ACC | GGGAATACCTGTGGGAGTAGT | GCTGGATTATCTTGGCTTCA |
| FAS | CATCCGGTCAGAGAGTACTTTT | TAGGGTTATGATGCTCTTCACC |
| CPT1 | TATGTGAGGATGCTGCTTCC | CTCGGAGAGCTAAGCTTGTC |
| PEPCK | TGCGGATCATGACTCGGATG | AGGCCCAGTTGTTGACCAAA |

Table S4. Bile acid profile of liver tissue, nmol/g.

|  | Group | | *P*-value |
| --- | --- | --- | --- |
|  | NBW | LBW |
| C4 | 0.36 ± 0.03 | 0.42 ± 0.06 | 0.084 |
| TwMCA | 0.43 ± 0.10 | 0.58 ± 0.34 | 0.377 |
| TaMCA | 0.17 ± 0.05 | 0.21 ± 0.14 | 0.515 |
| TbMCA | 0.38 ± 0.10 | 0.57 ± 0.46 | 0.377 |
| THCA | 3.96 ± 1.80 | 4.01 ± 2.50 | 0.969 |
| TCA | 3.11 ± 1.65 | 2.49 ± 0.70 | 0.460 |
| THDCA | 23.12 ± 16.54 | 9.83 ± 7.09 | 0.130 |
| TCDCA | 22.28 ± 14.10 | 10.37 ± 5.53 | 0.109 |
| TDCA | 0.10 ± 0.06 | 0.07 ± 0.03 | 0.289 |
| TLCA | 0.27 ± 0.13 | 0.06 ± 0.03 | 0.005 |
| wMCA | 0.31 ± 0.12 | 0.32 ± 0.08 | 0.967 |
| aMCA | 0.41 ± 0.13 | 0.42 ± 0.06 | 0.904 |
| bMCA | 0.86 ± 0.50 | 0.85 ± 0.42 | 0.972 |
| HCA | 0.11 ± 0.06 | 0.23 ± 0.16 | 0.150 |
| AlloCA | 0.31 ± 0.14 | 0.32 ± 0.06 | 0.876 |
| CA | 0.80 ± 0.42 | 1.07 ± 0.61 | 0.434 |
| NorCA | 0.03 ± 0.00 | 0.03 ± 0.00 | 0.740 |
| GHCA | 25.16 ± 10.38 | 35.71 ± 22.06 | 0.356 |
| GCA | 5.14 ± 2.31 | 7.73 ± 2.19 | 0.099 |
| GHDCA | 37.85 ± 22.52 | 27.49 ± 17.64 | 0.437 |
| GCDCA | 24.66 ± 12.96 | 18.55 ± 8.53 | 0.399 |
| GDCA | 0.27 ± 0.08 | 0.24 ± 0.06 | 0.545 |
| GLCA | 0.28 ± 0.13 | 0.08 ± 0.03 | 0.010 |
| muroCA | 0.74 ± 0.27 | 1.30 ± 0.57 | 0.079 |
| bHDCA | 0.08 ± 0.03 | 0.10 ± 0.03 | 0.216 |
| UDCA | 0.04 ± 0.02 | 0.04 ± 0.01 | 0.787 |
| HDCA | 0.63 ± 0.29 | 1.15 ± 0.40 | 0.041 |
| bDCA | 0.03 ± 0.02 | 0.03 ± 0.02 | 0.508 |
| CDCA | 0.23 ± 0.10 | 0.37 ± 0.14 | 0.111 |
| DCA | 1.78 ± 1.41 | 1.48 ± 0.77 | 0.684 |
| NorDCA | 0.39 ± 0.05 | 0.40 ± 0.06 | 0.800 |
| isoalloLCA | 0.03 ± 0.02 | 0.02 ± 0.01 | 0.676 |
| isoLCA | 0.01 ± 0.01 | 0.01 ± 0.00 | 0.780 |
| LCA | 0.11 ± 0.06 | 0.10 ± 0.03 | 0.687 |
| LCA-3S | 0.45 ± 0.06 | 0.46 ± 0.06 | 0.765 |
| dehydroLCA | 0.01 ± 0.00 | 0.01 ± 0.00 | 0.736 |
| 6-KetoLCA | 0.09 ± 0.03 | 0.12 ± 0.06 | 0.346 |
| 7-KetoLCA | 0.32 ± 0.04 | 0.33 ± 0.04 | 0.736 |
| 12-KetoLCA | 0.41 ± 0.11 | 0.39 ± 0.05 | 0.847 |
| apoCA | 0.06 ± 0.01 | 0.06 ± 0.03 | 0.935 |
| 7-DHCA | 0.20 ± 0.16 | 0.19 ± 0.09 | 0.953 |
| 12-DHCA | 0.03 ± 0.01 | 0.03 ± 0.02 | 0.770 |
| 3-DHCA | 0.08 ± 0.01 | 0.08 ± 0.01 | 0.273 |
| CA-3-S | 0.47 ± 0.20 | 0.43 ± 0.11 | 0.724 |
| Sulfate-GCA | 0.14 ± 0.01 | 0.19 ± 0.02 | 0.001 |
| Conjugated BAs | 147.32 ± 79.90 | 118.18 ± 63.20 | 0.537 |
| Unconjugated BAs | 9.37 ± 3.77 | 10.74 ± 1.58 | 0.469 |
| TBAs | 156.61±78.80 | 128.92±62.87 | 0.552 |


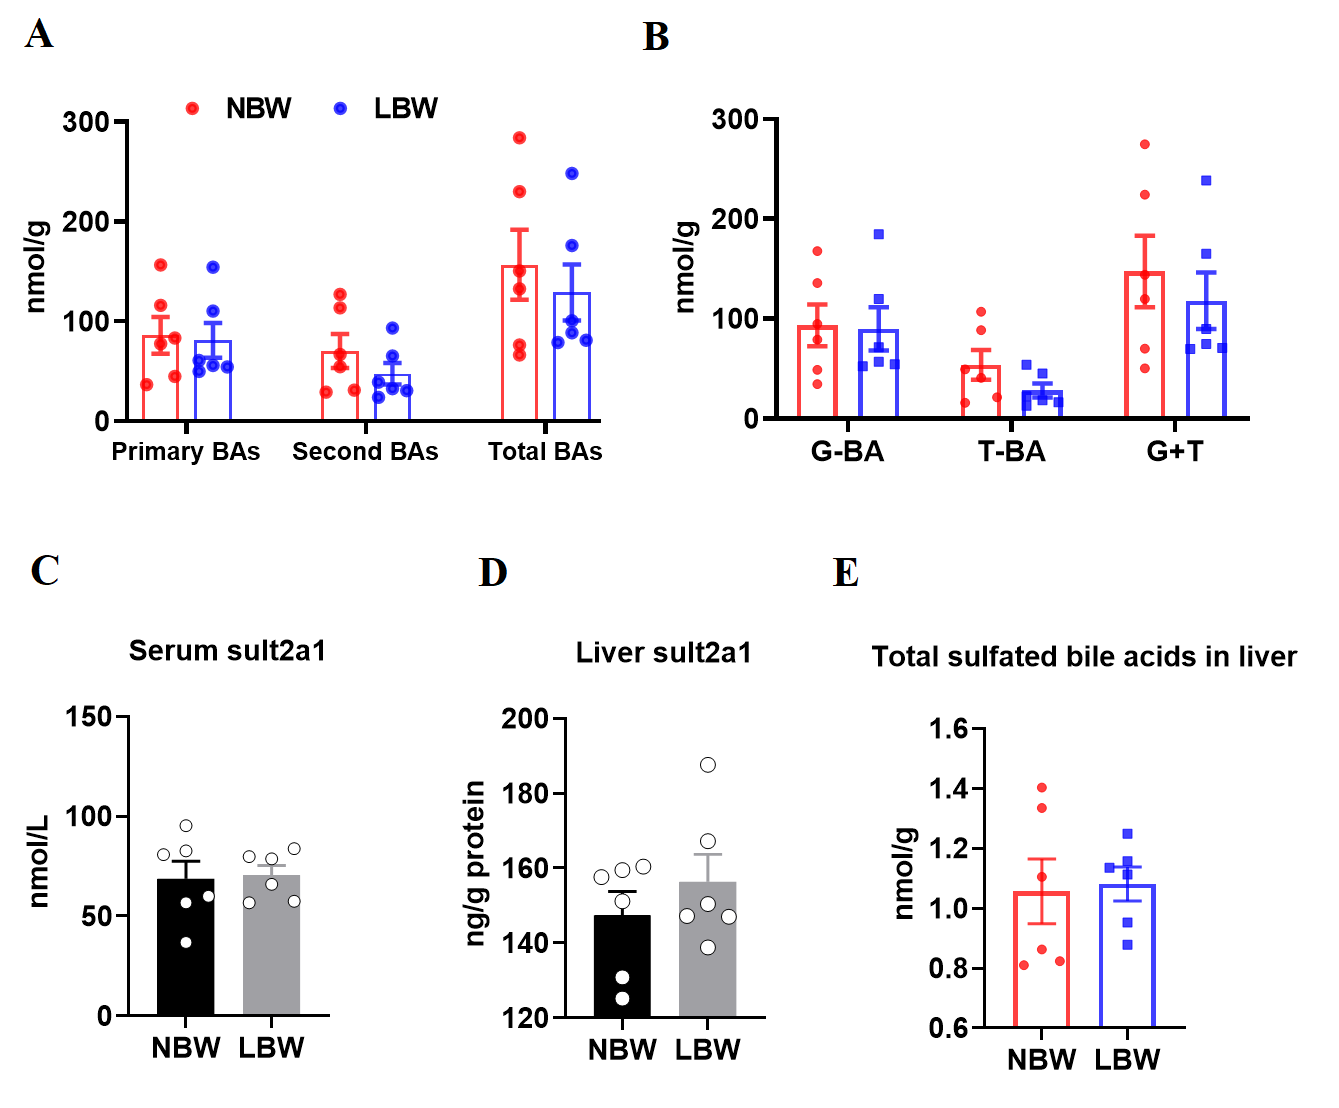


Fig. S1. LBW fetuses exhibit reduced hepatic glycogen stores and increased hepatic lipid accumulation. (A) Concentrations of primary BAs, secondary BAs, and TBAs in liver tissue. (B) Concentrations of primary BAs, secondary BAs, and TBAs in liver tissue. (C) Serum and liver sult2a1 Concentrations.


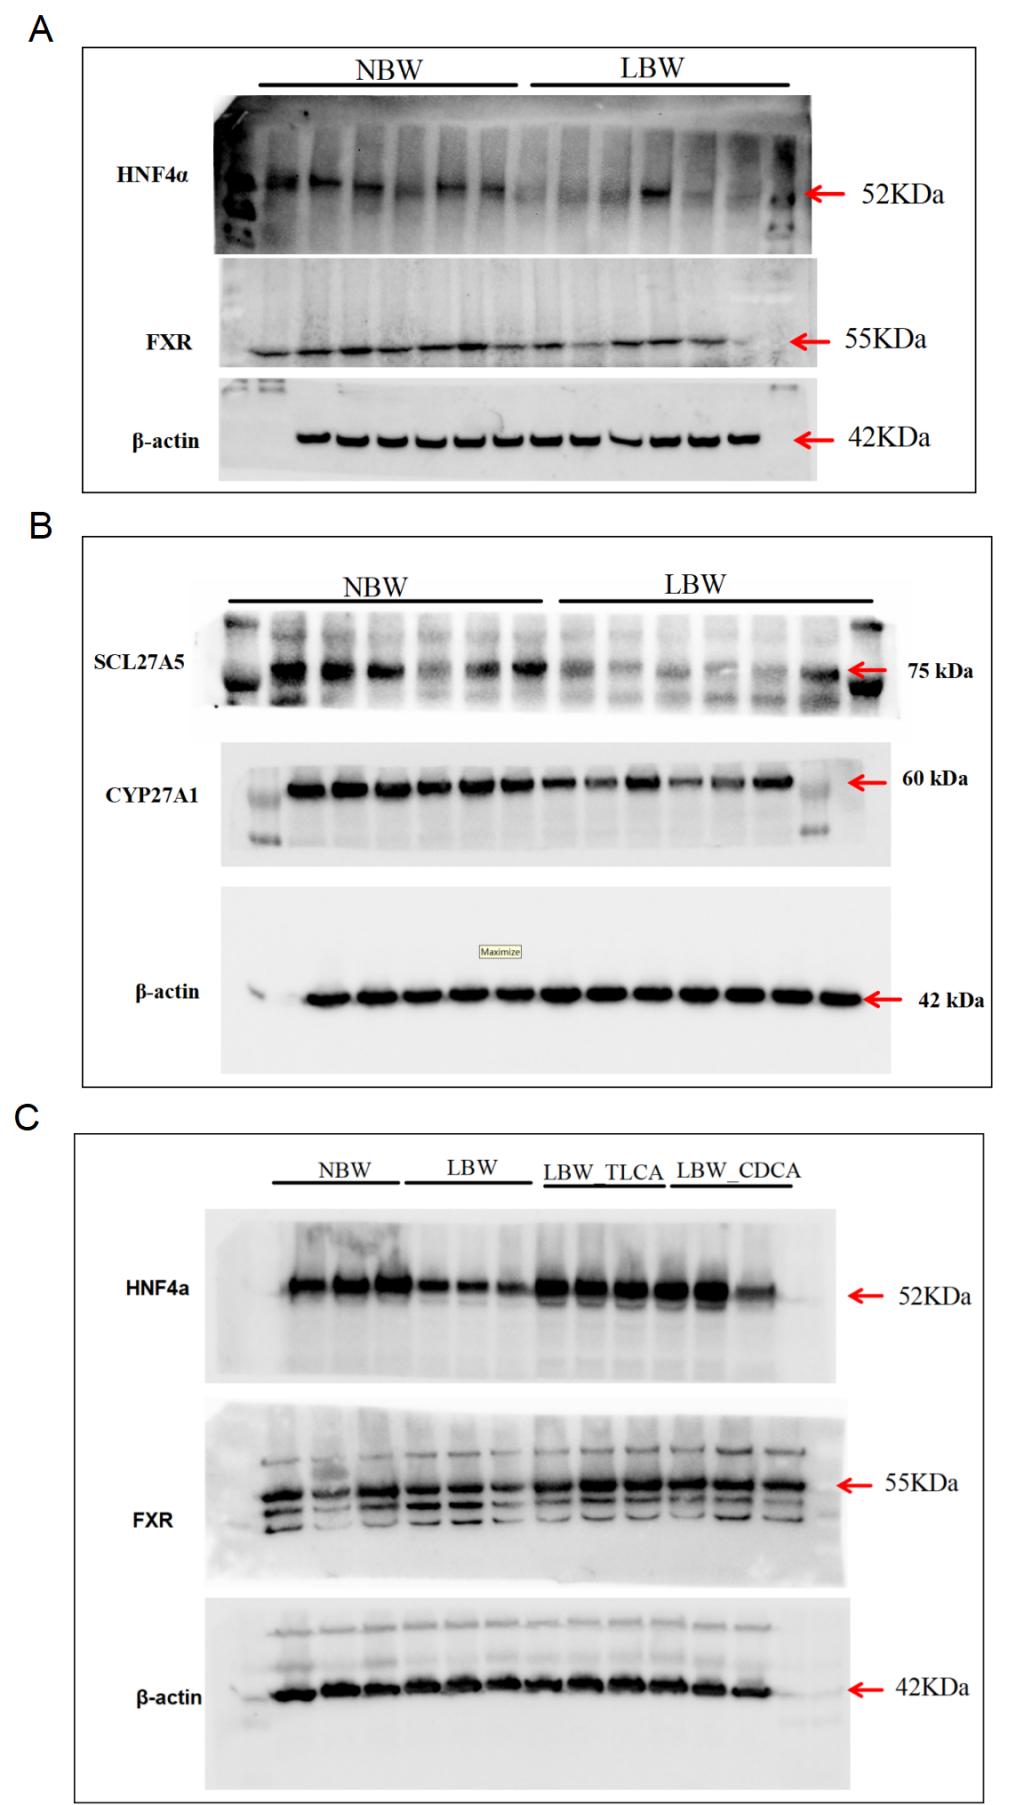


Fig. S2. Blots image in animal study. (A) Relative expression levels of FXR and HNF4α proteins normalized to β-actin in the liver tissue. (B) Protein expression levels of SLC27A5 and CYP27A1 normalized to β-actin in the liver. (C) Relative protein expression levels of FXR and HNF4α normalized to β-actin in the liver.


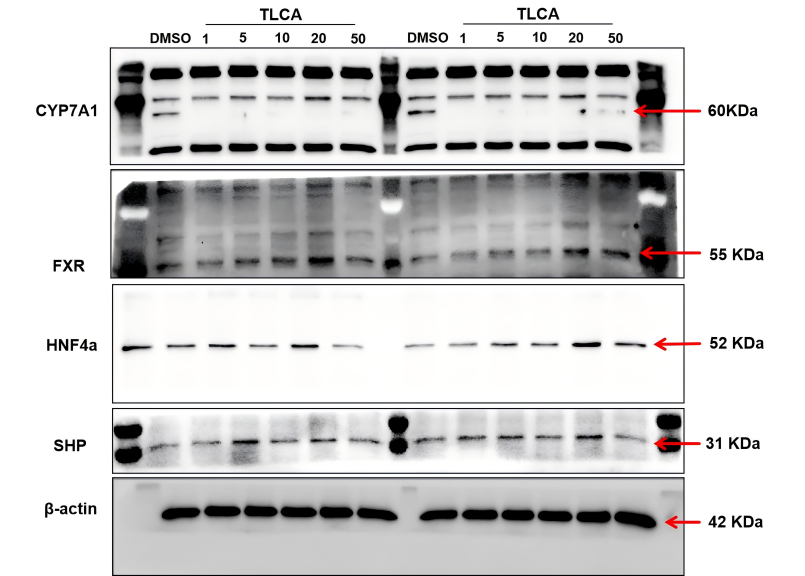


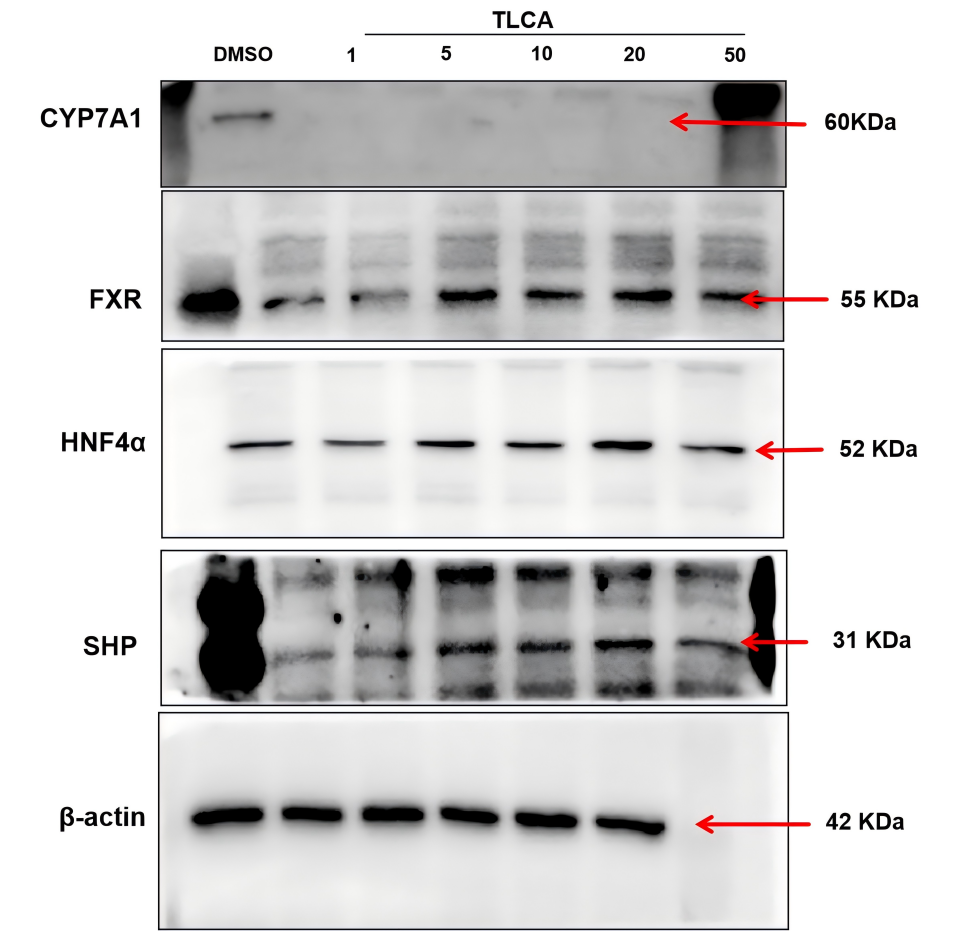


Fig. S3. Blots image in Hepa1-6 cells. Relative protein expression levels of CYP7A1, FXR, HNF4α, and SHP normalized to β-actin.

1. * Correspondence:

   [ZFang@sicau.edu.cn](mailto:ZFang@sicau.edu.cn ) (Z. F.); Tel: 0835-2882363; Fax: 0835-2882363

   [huliang@sicau.edu.cn](mailto:huliang@sicau.edu.cn)；Tel: 0835-2882311

   Key Laboratory for Animal Disease-Resistance Nutrition of China Ministry of Education, Animal Nutrition Institute, Sichuan Agricultural University, 211 Huimin Road, Wenjiang District, Chengdu, 611130, China;

   2 Key Laboratory of Agricultural Product Processing and Nutrition Health (Co-construction by Ministry and Province), Ministry of Agriculture and Rural Affairs, College of Food Science, Sichuan Agricultural University, Ya’ an 625014, China;

   3 Dekon food and agriculture group, Chengdu, China [↑](#footnote-ref-0)
